# Supplementary material for: Novel Chimeric Gene Therapy Vectors Based on Adeno-Associated Virus and Four Different Mammalian Bocaviruses
Source: PubMed Central journal article supplement — Mol Ther Methods Clin Dev. 2019 Jan 18;12:202–22. doi: 10.1016/j.omtm.2019.01.003 (PMC6360332; doi:10.1016/j.omtm.2019.01.003), 2019-01-18
Supplement: mmc1.pdf [file mmc1.pdf]

OMTM, Volume 12

## **Supplemental Information**

### **Novel Chimeric Gene Therapy Vectors Based on Adeno-Associated Virus and Four Different Mammalian Bocaviruses**

**Julia Fakhiri, Marc A. Schneider, Jens Puschhof, Megan Stanifer, Verena Schildgen, Stefan Holderbach, Yannik Voss, Jihad El Andari, Oliver Schildgen, Steeve Boulant, Michael Meister, Hans Clevers, Ziyang Yan, Jianming Qiu, and Dirk Grimm**

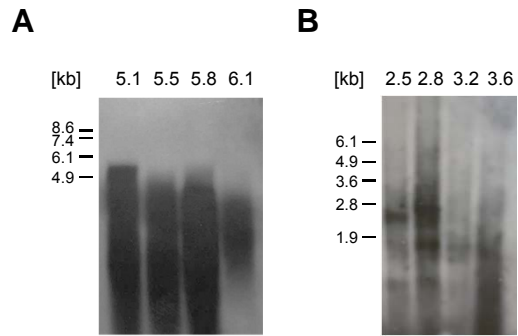

**Figure S1. Southern blot analysis of rAAV genomes packaged into AAV2.** (A) The oversized ssAAV-CRISPR genomes shown in Figure 1D were packaged into AAV2 capsids. The packaged viral DNA was isolated and resolved on a 0.7% alkaline agarose gel. The number above each lane indicates the size of the packaged genome. AAV vector genomes were labeled with a probe against the *SpCas9* cassette. (B) Neutral gel electrophoresis of scAAV-YFP genomes packaged into AAV2 capsids (see Fig. 1G for schemes of all constructs). Southern blotting was performed using a probe against the *yfp* cassette.

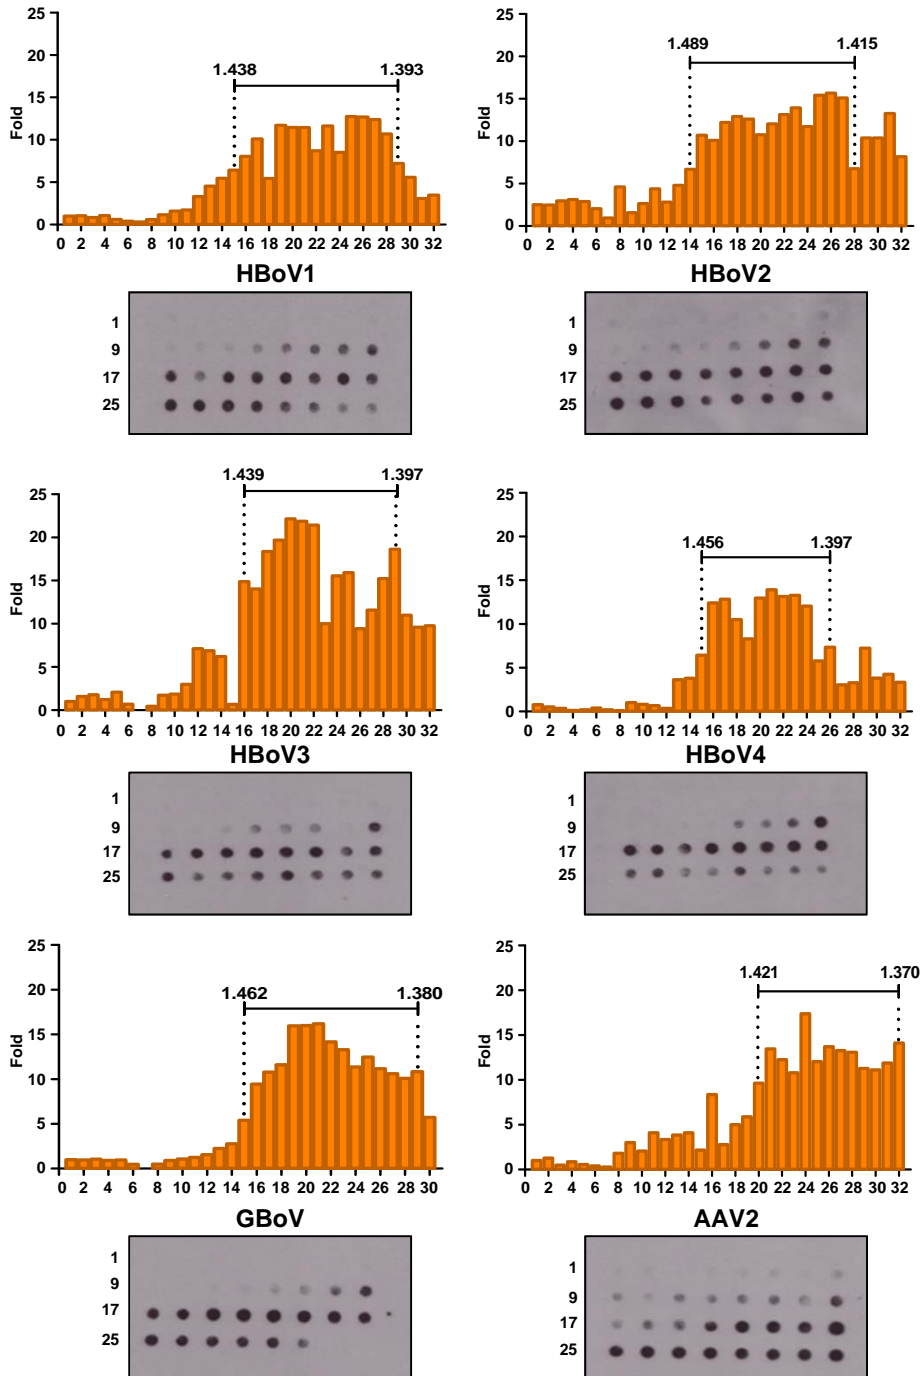

**Figure S2. Purification of scAAV-YFP/BoV vectors using CsCl density centrifugation.** scAAV-YFP genomes were packaged into HBoV1-4/GBoV or AAV2 as control using the triple transfection protocol. Viral particles were purified from the crude cell lysate using CsCl density centrifugation. To determine the virus-containing fractions, a total of 30 to 32 fractions was collected from each CsCl gradient. For detection of encapsidated AAV genomes, 10 to 15  $\mu$ L of each fraction were loaded onto a dot blot apparatus followed by Southern blot analysis using a probe binding in the *yfp* cassette. Dot blots were analyzed in ImageJ and the optical density of each spot was determined after background subtraction. From these densities, the fold-change to fraction 1 was calculated and plotted on the y-axis. Brackets define the range with the highest viral content, and the numbers above refer to the density of the indicated fractions (g/ml).

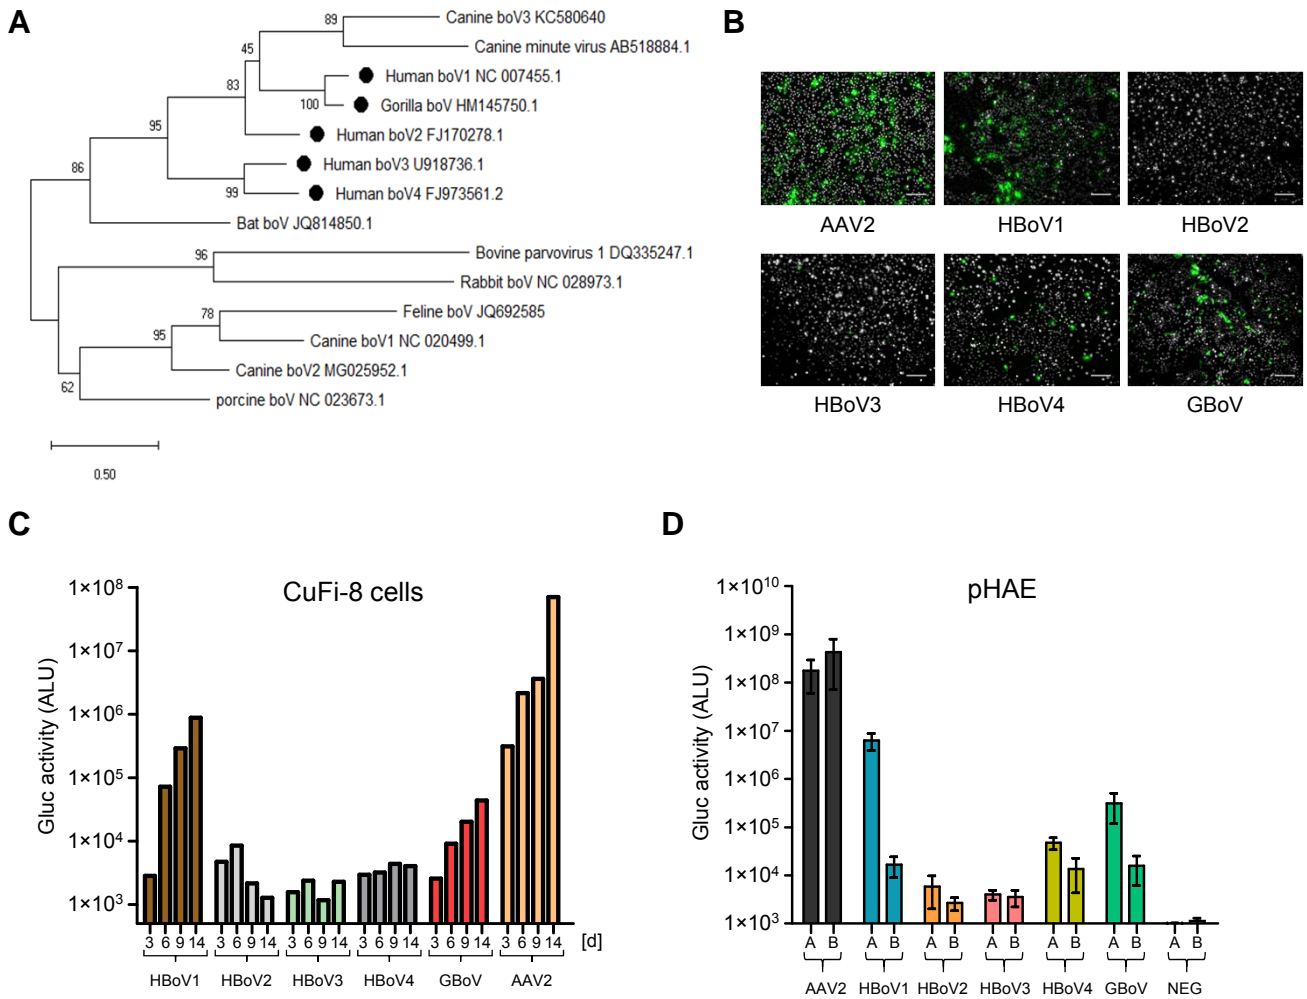

**Figure S3. Phylogenetic analysis and initial testing of scAAV-YFP/BoV vectors on pHAE and CuFi-8 cell line.** (A) Phylogenetic analysis of the BoV serotypes used in this work (marked with black circles). The evolutionary history was inferred in MEGAX by using the Maximum Likelihood method based on the Tamura-Nei model. The percentage of replicate trees in which the associated taxa clustered together in the bootstrap test (1000 replicates) are shown next to the branches. The scale bar represents the average number of nucleotide substitutions per site. (B) Transduction of pHAE with scAAV-YFP/BoV or AAV2 as control (MOI of  $4 \times 10^4$ ). Nuclei were stained with Hoechst. Images were taken 14 days post-transduction. Scale bar = 50  $\mu$ m. (C) Transduction of CuFi-8 cell line with scAAV-Gluc/BoV vectors or AAV2 as control. A total of  $2 \times 10^{10}$  viral genomes was added to the apical side of each transwell overnight in the presence of doxorubicin and LLnL at final concentrations of 1  $\mu$ M and 8 nM, respectively. Gluc activity was measured at time intervals of 3, 6, 9 and 14 days post-transduction. Shown is the average of two replicates, *i.e.*, two independent transwells. (D) Transduction of pHAE at a MOI of  $2 \times 10^4$  with scAAV-Gluc/BoV variants from the apical (A) or basolateral (B) side of the transwell. Shown is the measured Gluc activity (mean  $\pm$  SEM, n = 5) in the medium at day 9 post-transduction. For the transduction of pHAE, LLnL and doxorubicin were added at concentrations of 40  $\mu$ M and 5  $\mu$ M, respectively.

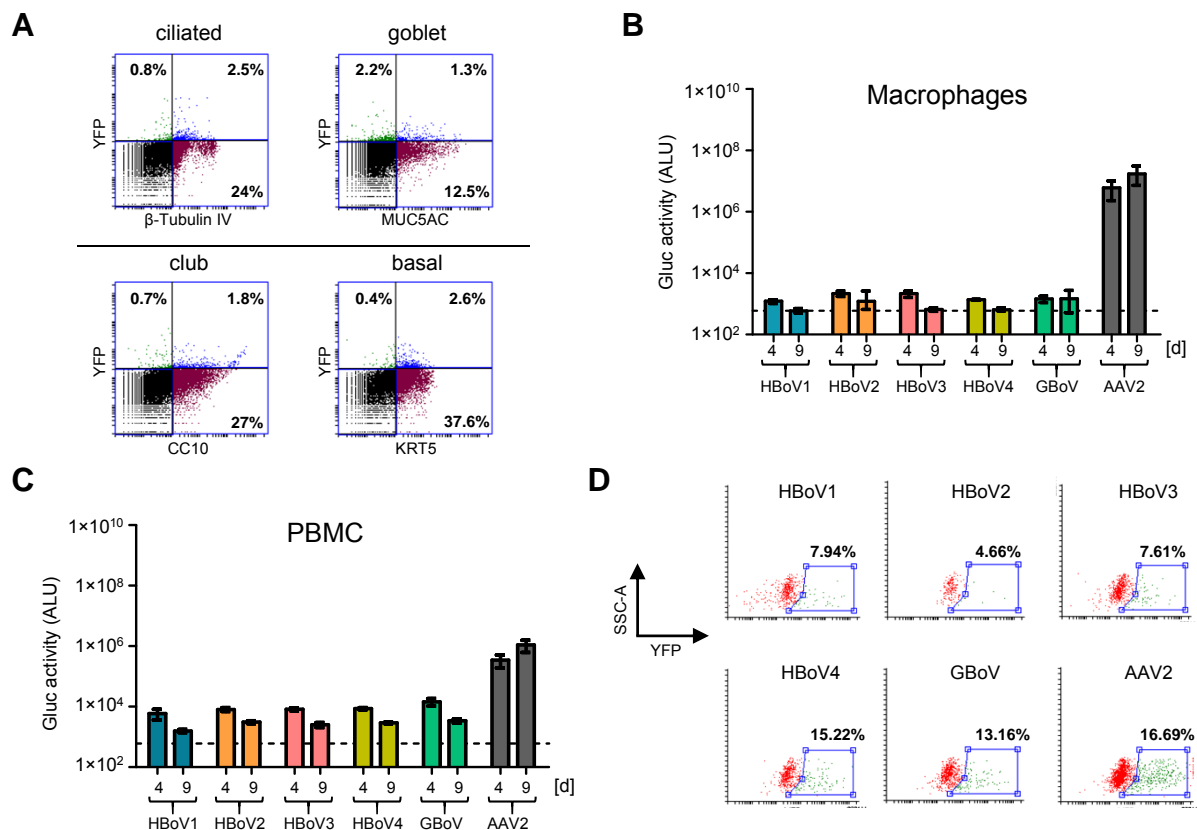

**Figure S4. Transduction of primary human cells with scAAV/BoV vectors.** (A) Flow cytometry analysis of pHAE transduced with scAAV-YFP/GBoV at a MOI of  $5 \times 10^4$ ,  $n = 4$  independent transwells. Cells were co-stained for YFP and a cell type-specific marker:  $\beta$ -Tubulin IV (ciliated cells), MUC5AC (goblet cells), CC10 (club cells), or KRT5 (basal cells). Percentages of double-positive cells are shown in the upper right quarter. (B) Transduction of primary macrophages with  $5 \times 10^8$  genomes of scAAV-Gluc/BoV vectors or AAV2 control. Gluc activity was measured at 4 and 9 days post-transduction. Shown is the mean plus range of two donors. (C) Transduction of primary PBMCs with scAAV-Gluc/BoV vectors or AAV2 control (MOI of  $6 \times 10^4$ ). Gluc activity was measured at 4 and 9 days post-transduction. Shown is the mean plus range of two donors. (D) Flow cytometry analysis of primary T-cells transduced with scAAV-YFP/BoV vectors or AAV2 control (MOI of  $6 \times 10^4$ ). Only living cells were analyzed. The percentage of YFP-positive cells is shown.

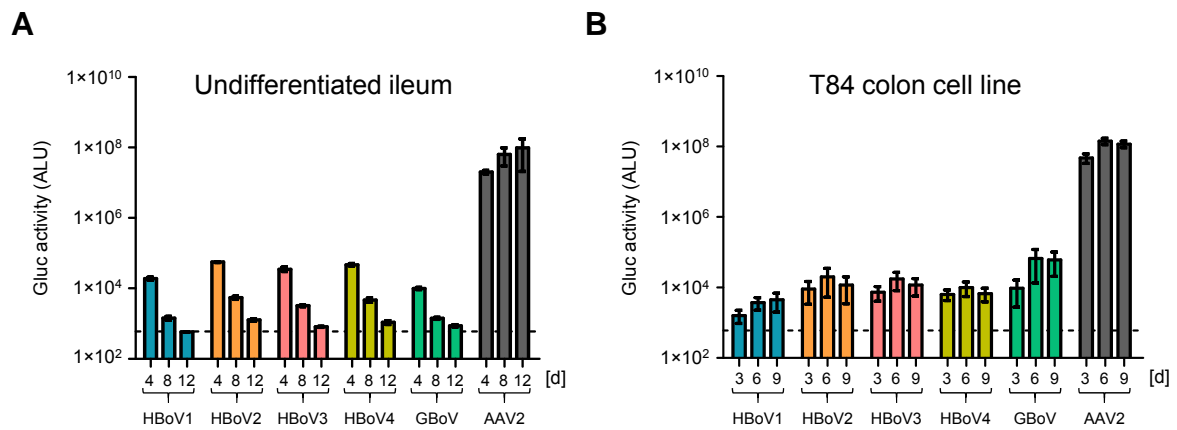

**Figure S5. Transduction of primary intestinal cells and cell lines with scAAV-Gluc/BoV vectors.** (A) Transduction of undifferentiated primary human ileum organoids which were maintained in basal medium. Organoids were transduced with  $5 \times 10^9$  viral genomes of scAAV-Gluc/BoV, and the Gluc activity was measured at the indicated time points. Data represent the mean and range of two independent experiments ( $n = 2$  donors). All transductions were performed in the presence of  $1 \mu\text{M}$  doxorubicin. (B) T84 colon adenocarcinoma cells were transduced with scAAV-Gluc/BoV vectors or AAV2 control at  $\text{MOI} = 5 \times 10^4$ . Secreted Gluc activity was measured in the medium at 3 to 9 days post-transduction. Shown is the mean ( $\pm \text{SEM}$ ) of three independent experiments.

**Table S1.** Titers of rAAV-YFP vectors obtained using iodixanol versus CsCl purification.

|       | Iodixanol                        | CsCl                             |
|-------|----------------------------------|----------------------------------|
|       | Titer (gc / cell) <sup>a,b</sup> | Titer (gc / cell) <sup>a,c</sup> |
| HBoV1 | 4.6×10 <sup>3</sup>              | 1.5×10 <sup>3</sup>              |
| HBoV2 | 5.7×10 <sup>3</sup>              | 2.0×10 <sup>3</sup>              |
| HBoV3 | 4.9×10 <sup>3</sup>              | 2.6×10 <sup>3</sup>              |
| HBoV4 | 1.0×10 <sup>4</sup>              | 3.9×10 <sup>3</sup>              |
| GBoV  | 8.4×10 <sup>3</sup>              | 5.4×10 <sup>3</sup>              |
| AAV2  | 2.4×10 <sup>4</sup>              | 1.1×10 <sup>4</sup>              |

<sup>a</sup> gc, genome copies.

<sup>b</sup> Data represent the average of four (BoV) or two (AAV2) independent productions and titrations.

<sup>c</sup> Data represent the average of two independent productions.

**Table S2.** Ratios of Gluc expression at day 9 post-transduction with the different BoV variants (or the AAV2 control) relative to HBoV1 (set to 1.0).

|       | SK     | Cardio  | Pul     | Vein    | T-cells | pHeps <sup>a</sup> | Colon  | pHAE <sup>b</sup> | Lung (in) | Lung (br) | CuFi-8 | T84     |
|-------|--------|---------|---------|---------|---------|--------------------|--------|-------------------|-----------|-----------|--------|---------|
| HBoV1 | 1.0    | 1.0     | 1.0     | 1.0     | 1.0     | 1.0                | 1.0    | 1.0               | 1.0       | 1.0       | 1.0    | 1.0     |
| HBoV2 | 5.1    | 1.1     | 1.1     | 0.5     | 3.9     | 1.3                | 4.1    | 0.0               | 0.3       | 0.1       | 0.01   | 2.7     |
| HBoV3 | 3.0    | 0.1     | 1.2     | 0.5     | 18.5    | 0.4                | 2.9    | 0.0               | 0.4       | 0.1       | 0.0    | 2.6     |
| HBoV4 | 2.4    | 0.7     | 0.6     | 0.5     | 56.9    | 1.0                | 4.0    | 0.1               | 0.2       | 0.2       | 0.02   | 1.5     |
| GBoV  | 8.3    | 2.9     | 7.8     | 1.0     | 114.5   | 0.9                | 1.8    | 0.6               | 0.2       | 0.8       | 0.07   | 13.7    |
| AAV2  | 8088.0 | 61458.0 | 64677.0 | 15839.0 | 435.0   | 2461.7             | 3907.0 | n.d.              | 184.6     | 7667.2    | 12.4   | 26554.0 |

<sup>a</sup> Data were calculated based on Gluc expression at day 6 because of deteriorating cell vitality at day 9.

<sup>b</sup> Transduction from the apical side. Data were calculated from Fig. 2D.

n.d., not determined



**Table S3.** Primers used in this study.

| No. | Primer Name                 | Primer sequence (5'- 3')                                                  |
|-----|-----------------------------|---------------------------------------------------------------------------|
| #1  | F1_HIND III                 | GACAATA <b>AAGCTT</b> TACAGCTTTTG                                         |
| #2  | R1_2xBsmb1                  | CAAAAAAGAGGCTTATAAGAT <b>AGACGCTGTCGCTC</b> ACTGCTTCCATGCTTTCAGC          |
| #3  | F2_2xBsmb1                  | TGCTGAAAGCATGGAAGCAGT <b>AGACGACAGCGTCTC</b> ATCTTATAAGCCTCTTTTTTGCTTCTGC |
| #4  | R2_NotI                     | AT <b>AGCGCGCCG</b> CTCTAGATGTA                                           |
| #5  | Boca3_part1_not1_fwd        | ATTAG <b>CGCGCCG</b> CATGCCTCCAATTA <b>AAAGGCAA</b> C                     |
| #6  | Boca3_part1_bsmb1_rev       | GAT <b>CCGTCTCG</b> CTTCCATTTCTGCAAGTTCATG                                |
| #7  | Boca3_part2_Bsmb1_fwd       | GAT <b>CCGTCTCG</b> GAAAGACTCCAATGCAGTAGAAAAAGCA                          |
| #8  | Boca3_part2_clal_rev        | GAT <b>CATCGAT</b> TTACAACACTTTATTGATGTTTGTTTAACTGG                       |
| #9  | Boca4_part1_not1_fwd        | GAT <b>CGCGCCG</b> CATGCCTCCAATTAACGC                                     |
| #10 | Boca4_part1_bsmb1_rev       | GAT <b>CCGTCTCG</b> CTTCCATTT <b>CAGCAAGTTCATG</b>                        |
| #11 | Boca4_part2_Bsmb1_fwd       | GAT <b>CCGTCTCG</b> GAAAGACTCAAATGCTGTAGAAAAAGCA                          |
| #12 | Boca4_part2_clal_rev        | GAT <b>CATCGAT</b> TTACAACACTTTATTGATGTTTGTTTAACTGGAAAG                   |
| #13 | BocaGo_part1_not1_fwd       | GAT <b>CGCGCCG</b> CATGCCTCCAATTA <b>AAAGGCA</b>                          |
| #14 | BocaGo_part1_Bsmb1_rev      | GAT <b>CCGTCTCG</b> TTCATCAAGATCGGCAAGC                                   |
| #15 | BocaGo_part2_Bsmb1_fwd      | GAT <b>CCGTCTCG</b> GGAAGACTACTGCTGGAGGAACTGC                             |
| #16 | JF_BocaGo_part2.1_Bsmb1_rev | GAT <b>CCGTCTCG</b> CTCTGTAGAGGAGTTGGTCTCTAAGC                            |
| #17 | JF_Goboca_part2.2_Bsmb1_fwd | GAT <b>CCGTCTCG</b> AGAGGAAACCAACAACATAC                                  |
| #18 | BocaGo_part2_clal_rev       | GAT <b>CATCGAT</b> TTACAACACTTTATTGATGTTTGTTT <b>TTACAGGCATA</b>          |
| #19 | Boca2_part1_not1_Fwd        | ATTAG <b>CGCGCCG</b> CATGCCTCCAATTAACGC                                   |
| #20 | Boca2_sub1_Bsmb1_rev        | GAT <b>CCGTCTCG</b> CCAG ATGTTGTTGGTCTTG                                  |
| #21 | Boca2_sub2_Bsmb1_fwd        | GAT <b>CCGTCTCG</b> CTGG CTCCATGGAGGAGCGAGG                               |
| #22 | Boca2_part1_Bsmb1_rev       | GAT <b>CCGTCTCG</b> CGTCTTCCATTT <b>CAGCCAGT</b>                          |
| #23 | Boca2_part2_Bsmb1_Fwd       | GAT <b>CCGTCTCG</b> GACGCAAATGCTGTAGAAAAAGCTATAGC                         |
| #24 | Boca2_part2_Clal_rev        | GAT <b>CATCGAT</b> TTACAACACTTTATTGATGTTTGTTT <b>TGA</b>                  |
| #25 | JF_boca4_Bsmb1_fwd          | GTT <b>ACGTCTCT</b> GCAGATGCCTCCAATTAACGC                                 |
| #26 | JF_boca4_Bsmb1_rev          | GTT <b>ACGTCTCT</b> AAGATTACAACACTTTATTGATGTTTGTTTTAAC                    |
| #27 | JF_boca3_Bsmb1_fwd          | GTT <b>ACGTCTCT</b> GCAGATGCCTCCAATTA <b>AAAGGCA</b> AC                   |
| #28 | JF_boca3_Bsmb1_rev          | GTT <b>ACGTCTCT</b> AAGATTACAACACTTTATTGATGTTTGTTTTAAC                    |
| #29 | JF_Goboca_Bsmb1_fwd         | GTT <b>ACGTCTCT</b> GCAGATGCCTCCAATTA <b>AAAGGCA</b>                      |
| #30 | JF_Goboca_bsmb1_rev         | GTT <b>ACGTCTCT</b> AAGATTACAACACTTTATTGATGTTTGTTTTAC                     |
| #31 | JF_boca2_Bsmb1_fwd          | GTT <b>ACGTCTCT</b> GCAGATGCCTCCAATTAACGC                                 |
| #32 | JF_boca2_Bsmb1_rev          | GTT <b>ACGTCTCT</b> AAGATTACAACACTTTATTGATGTTTGTTTTG                      |

|     |                            |                                                        |
|-----|----------------------------|--------------------------------------------------------|
| #33 | Acceptor shuffling OE fwd1 | GACAGAAG <b>AGAGACG</b> CGGAAAGTGAAGGGTGAC<br>TG       |
| #34 | Acceptor shuffling OE Rev1 | GGCTAGGTT <b>CGAGACG</b> GTAAC                         |
| #35 | Acceptor shuffling OE Rev2 | CCCTTCACTTTCCG <b>CGTCTCT</b> CTTCTGTCTGTGAG<br>GAAACA |
| #36 | HboV1 wt genome Eagl fwd   | GATT <b>CCGGCCG</b> CCACAAGGAGGAGTGGTTATA              |
| #37 | HboV1 wt genome PacI rev   | AGTT <b>CTTAATTA</b> ATAAGCAAACAAAACAGCTCC             |
| #38 | HBoV1_BstBI fwd            | CACTG <b>CTT</b> <b>CGAAG</b> ACCTCA                   |
| #39 | HBoV1 rev                  | CACAATGTACAAGGGCTGTC                                   |
| #40 | Fwd_chimBoV_BsmbI          | AATG <b>ACGTCTCC</b> GAAGCAGACGAGATAACTGACG<br>AGG     |
| #41 | LacZ fwd                   | <b>CGGAATTC</b> GTGCCGAAAGCTGGCTGGAG                   |
| #42 | LacZ 500 rev               | ACTT <b>GAATTC</b> GTAGCGGCTGATGTTGAACTGG              |
| #43 | LacZ 800 rev               | <b>CGGAATTC</b> GCAGACCATTTTCAATCCGCAC                 |
| #44 | LacZ 1200 rev              | <b>CGGAATTC</b> GATCCAGCGATACAGCGCGTC                  |
| #45 | LacZ 1600 rev              | <b>CGGAATTC</b> GCAAAGACCAGACCGTTCATAC                 |
| #46 | Cas9_Nhe_fw                | ATCAG <b>CGCTAG</b> CGCCACCATGGATTACAAAGAC             |
| #47 | Cas9_Cla_rv                | GCTGAT <b>ATCGATT</b> CATTTCTTTTTCTTAGCTTGAC<br>CAGC   |
| #48 | CMV_pacl_fwd               | GTTACT <b>TAATTAATT</b> CGGTACCCGTTACATAACTT<br>ACGG   |
| #49 | SV40_Intron_NheI           | GTTA <b>CGCTAG</b> CGGTGGCGACCGGTGCGG                  |

Bold: restriction sites.

**Table S4.** Promoters used in this study.

| Promoter | Sequence (5' - 3')                                                                                                                                                                                                                                                                                                                                                                                                                                                                                                                                                                                                                                                                                                                                                                                                                                                                                                                                                        |
|----------|---------------------------------------------------------------------------------------------------------------------------------------------------------------------------------------------------------------------------------------------------------------------------------------------------------------------------------------------------------------------------------------------------------------------------------------------------------------------------------------------------------------------------------------------------------------------------------------------------------------------------------------------------------------------------------------------------------------------------------------------------------------------------------------------------------------------------------------------------------------------------------------------------------------------------------------------------------------------------|
| miCMV    | GACTCACGGGGATTTCCAAGTCTCCACCCCATTTGACGTCAATGGGAGTTT<br>GTTTTGGCACCAAAATCAACGGGACTTTCCAAAATGTCGTAACAACTCCG<br>CCCCATTGACGCAAATGGGCGGTAGGCGTGTACGGTGGGAGGTCTATAT<br>AAGCAGAGCTCGTTTAGTGAACCGTCAGATC                                                                                                                                                                                                                                                                                                                                                                                                                                                                                                                                                                                                                                                                                                                                                                         |
| CMV      | CTGGATTACATAACTTACGGTAAATGGCCCGCCTGGCTGACCGCCCAAC<br>GACCCCGCCCATTTGACGTCAATAATGACGTATGTTCCCATAGTAACGCC<br>AATAGGGACTTTCCATTGACGTCAATGGGTGGAGTATTTACGGTAAACTG<br>CCCCTTGGCAGTACATCAAGTGTATCATATGCCAAGTACGCCCCCTATT<br>GACGTCAATGACGGTAAATGGCCCGCCTGGCATTATGCCCAGTACATGA<br>CCTTATGGGACTTTCCCTACTTGGCAGTACATCTACGTATTAGTCATCGCTA<br>TTACCATGGTGATGCGGTTTTGGCAGTACATCAATGGGCGTGGATAGCG<br>GTTTGACTCACGGGGATTTCCAAGTCTCCACCCCATTTGACGTCAATGGGA<br>GTTTGTTTTGGCACCAAAATCAACGGGACTTTCCAAAATGTCGTAACAACT<br>CCGCCCATTTGACGCAAATGGGCGGTAGGCGTGTACGGTGGGAGGTCT<br>ATATAAGCAGAGCTGG                                                                                                                                                                                                                                                                                                                                                                                                |
| CMV+I    | TTCGGTACCCGTTACATAACTTACGGTAAATGGCCCGCCTGGCTGACCG<br>CCCAACGACCCCGCCCATTTGACGTCAATAATGACGTATGTTCCCATAGT<br>AACGCCAATAGGGACTTTCCATTGACGTCAATGGGTGGAGTATTTACGGT<br>AAACTGCCCACTTGGCAGTACATCAAGTGTATCATATGCCAAGTACGCC<br>CCTATTGACGTCAATGACGGTAAATGGCCCGCCTGGCATTATGCCCAGTA<br>CATGACCTTATGGGACTTTCCCTACTTGGCAGTACATCTACGTATTAGTCAT<br>CGCTATTACCATGGTGATGCGGTTTTGGCAGTACATCAATGGGCGTGGAT<br>AGCGGTTTGACTCACGGGGATTTCCAAGTCTCCACCCCATTTGACGTCAAT<br>GGGAGTTTGTTTTGGCACCAAAATCAACGGGACTTTCCAAAATGTCGTAA<br>CAACTCCGCCCATTTGACGCAAATGGGCGGTAGGCGTGTACGGTGGGA<br>GGTCTATATAAGCAGAGCTCGTTTAGTGAACCGTCAGAT <b>TCGCCTGGAGA</b><br><b>CGCCATCCACGCTGTTTTGACCTCCATAGAAGACACCGGGACCGATCC</b><br><b>AGCCTCCGGACTCTAGAGGATCCGGTACTCGAGGAACTGAAAAACCAG</b><br><b>AAAGTTAACTGGTAAGTTTAGTCTTTTTGTCTTTTATTTCAAGTCCCGGA</b><br><b>TCCGGTGGTGGTGCAAATCAAAGAACTGCTCCTCAGTGGATGTTGCCTT</b><br><b>TACTTCTAGGCCTGTACGGAAGTGTTACTTCTGCTCTAAAAGCTGCGGA</b><br><b>ATTGTACCCGCGGCCGCACCGGTCGCCACC</b> |

Bold: SV40 intron.

**Table S5.** Basal and differentiation media used for cultivation of intestinal crypts.

| <b>Basal media</b>                      | <b>Final concentration</b> |
|-----------------------------------------|----------------------------|
| DMEM/F12<br>+GlutaMAX<br>+HEPES<br>+P/S |                            |
| Wnt3A                                   | 50% by volume              |
| B27                                     | 1:50                       |
| N2                                      | 1:100                      |
| N-acetyl-cysteine                       | 1 mM                       |
| R-spondin                               | 10% by volume              |
| Noggin                                  | 100 ng/ml                  |
| EGF                                     | 50 ng/ml                   |
| Gastrin                                 | 10 mM                      |
| Nicotinamide                            | 10 mM                      |
| A83-01                                  | 500 nM                     |
| Sb202190                                | 10 $\mu$ M                 |

  

| <b>Differentiation Media</b>            | <b>Final concentration</b> |
|-----------------------------------------|----------------------------|
| DMEM/F12<br>+GlutaMAX<br>+HEPES<br>+P/S |                            |
| B27                                     | 1:50                       |
| N2                                      | 1:100                      |
| N-acetyl-cysteine                       | 1 mM                       |
| R-spondin                               | 5% by volume               |
| Noggin                                  | 50 ng/ml                   |
| EGF                                     | 50 ng/ml                   |
| Gastrin                                 | 10 mM                      |
| A83-01                                  | 500 nM                     |
| Sb202190                                | 10 $\mu$ M                 |

**Table S6.** Primer and probe sets used for titration of viral stocks.

| <b>Primer/Probes</b> | <b>Sequence 5'- 3'</b>                                |
|----------------------|-------------------------------------------------------|
| NP1_fwd              | GCACAGCCACGTGACGAA <sup>1</sup>                       |
| NP1_rev              | TGGACTCCCTTTTCTTTTGTAGGA <sup>1</sup>                 |
| BoV_NP1_Probe        | FAM-TGAGCTCAGGGAATATGAAAGACAAGCATCG-BHQ1 <sup>1</sup> |
| CMVenh_fwd           | AACGCCAATAGGGACTTTCC                                  |
| CMVenh_rev           | GGGCGTACTTGGCATATGAT                                  |
| CMVenh_Probe         | FAM-CGGTAAACTGCCCACTTGGCAGT-BHQ1                      |
| YFP_fwd              | GAGCGCACCATCTTCTTCAAG                                 |
| YFP_rev              | TGTCGCCCTCGAACTTCAC                                   |
| YFP_probe            | FAM-ACGACGGCAACTACA-BHQ1                              |

1. Huang, Q, Deng, X, Yan, Z, Cheng, F, Luo, Y, Shen, W, *et al.* (2012). Establishment of a reverse genetics system for studying human bocavirus in human airway epithelia. *PLoS Pathog* **8**: e1002899.
